# Supplementary material for: Winter Greenhouse Tomato Cultivation: Matching Leaf Pruning and Supplementary Lighting for Improved Yield and Precocity
Source: MDPI journal article supplement (doi:10.3390/agronomy13030671), 2023-02-25
Supplement: s1 [file s1]

**Figure S1.** Descriptive scheme of LED lamp location.

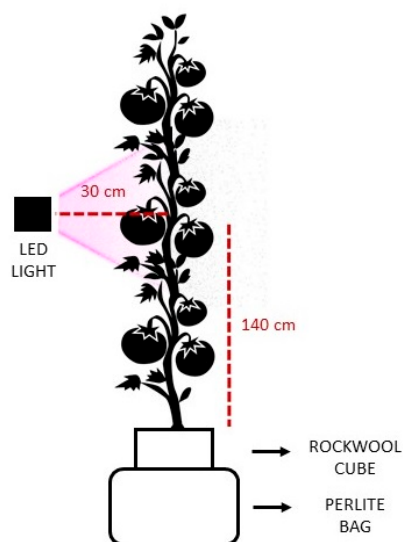

**Table S1.** Results of two-way ANOVA analysis.

| Evaluated parameters                               | LED | DEF | LED*DEF |
|----------------------------------------------------|-----|-----|---------|
| Collar diameter                                    | *** | ns  | ns      |
| Internode length                                   | ns  | ns  | ns      |
| Total leaf area                                    | ns  |     |         |
| Leaf fresh weight                                  | ns  |     |         |
| Leaf dry weight                                    | ns  |     |         |
| LDMC                                               | ns  |     |         |
| Plant total fresh weight                           | ns  |     |         |
| Plant total dry weight                             | ns  |     |         |
| Stem length                                        | ns  |     |         |
| SLA                                                | *   |     |         |
| Chlorophyll content leaf under 3° truss            | *** | ns  | ns      |
| Chlorophyll content leaf under 4° truss            | *** | ns  | ns      |
| Stomatal conductance (GS)                          | ns  | ns  | ns      |
| Under-leaf CO <sub>2</sub> concentration (Ci)      | ns  | ns  | ns      |
| Leaf transpiration (E)                             | ns  | ns  | ns      |
| Net photosynthesis (A)                             | *   | ns  | ns      |
| Effective quantum yield efficiency of PSII (ΦPSII) | *   | **  | ns      |
| PSII maximum efficiency (Fv/Fm)                    | ns  | ns  | ns      |
| Photochemical quenching of PSII (qP)               | *   | **  | ns      |
| Proximal fruit volume Follow up 1                  | ns  | **  | ns      |
| Proximal fruit volume Follow up 2                  | *   | ns  | ns      |
| Distal fruit volume Follow up 1                    | *** | ns  | ns      |
| Distal fruit volume Follow up 2                    | *** | ns  | ns      |
| Total number of fruits                             | *** | ns  | ns      |
| Total yield                                        | *** | ns  | ns      |
| Yield green tomatoes                               | ns  | ns  | ns      |
| Yield red tomatoes                                 | *** | ns  | ns      |
| Ripening Proximal Fruit Follow up 1                | ns  | **  | **      |

|                                     |     |    |     |
|-------------------------------------|-----|----|-----|
| Ripening Distal Fruit Follow up 1   | ns  | ns | ns  |
| Ripening Proximal Fruit Follow up 2 | *** | ns | ns  |
| Ripening Distal Fruit Follow up 2   | **  | ns | ns  |
| Fruit hardness                      | ns  | ns | ns  |
| L*                                  | *** | ns | ns  |
| HUE angle                           | *** | ns | ns  |
| Chroma                              | ns  | ns | ns  |
| Pulp firmness                       | ns  | ns | ns  |
| Soluble solids                      | ns  | *  | ns  |
| Titrateable acidity                 | *   | ns | *** |
| FDMC                                | ns  | ns | ns  |
| Lycopene                            | ns  | ns | ns  |
| β-carotene                          | ns  | ns | ns  |

ns =  $p > 0.05$ ; \* =  $p \leq 0.05$ ; \*\* =  $p \leq 0.01$ ; \*\*\* =  $p \leq 0.001$

LED = effect of supplemental LED light (RB or CK treatment)

DEF = effect of defoliation (R and NR treatment)

LED\*DEF = interaction among factors
